# Supplementary material for: Effects of Lactobacillus fermentum Administration on Intestinal Morphometry and Antibody Serum Levels in Salmonella-Infantis-Challenged Chickens
Source: MDPI journal article supplement (doi:10.3390/microorganisms11020256), 2023-01-19
Supplement: s1 [file s1]

| <b>Table S2.</b> COBB 500 Feed components and proximate composition of starter (0–8 days) and grower (9–14 days) diets.                                                                                                                                                                                                                                                                                                                                                                                                                                                                                                                  |                |               |
|------------------------------------------------------------------------------------------------------------------------------------------------------------------------------------------------------------------------------------------------------------------------------------------------------------------------------------------------------------------------------------------------------------------------------------------------------------------------------------------------------------------------------------------------------------------------------------------------------------------------------------------|----------------|---------------|
| <b>Ingredients (%)</b>                                                                                                                                                                                                                                                                                                                                                                                                                                                                                                                                                                                                                   | <b>starter</b> | <b>grower</b> |
| Ground corn                                                                                                                                                                                                                                                                                                                                                                                                                                                                                                                                                                                                                              | 52.99          | 57.23         |
| Soybean meal                                                                                                                                                                                                                                                                                                                                                                                                                                                                                                                                                                                                                             | 36.3           | 32.07         |
| Calcium carbonate                                                                                                                                                                                                                                                                                                                                                                                                                                                                                                                                                                                                                        | 1.52           | 1.49          |
| Monocalcium phosphate                                                                                                                                                                                                                                                                                                                                                                                                                                                                                                                                                                                                                    | 1.07           | 0.82          |
| Sodium chloride                                                                                                                                                                                                                                                                                                                                                                                                                                                                                                                                                                                                                          | 0.31           | 0.26          |
| Crude (vegetal) Fat                                                                                                                                                                                                                                                                                                                                                                                                                                                                                                                                                                                                                      | 7.4            | 7.71          |
| Antimycotic                                                                                                                                                                                                                                                                                                                                                                                                                                                                                                                                                                                                                              | 0.10           | 0.08          |
| Mycotoxin Sequestrant                                                                                                                                                                                                                                                                                                                                                                                                                                                                                                                                                                                                                    | 0.05           | 0.05          |
| Antioxidant                                                                                                                                                                                                                                                                                                                                                                                                                                                                                                                                                                                                                              | 0.02           | 0.02          |
| Phytase                                                                                                                                                                                                                                                                                                                                                                                                                                                                                                                                                                                                                                  | 0.01           | 0.01          |
| <sup>1</sup> Vitamin and mineral premix                                                                                                                                                                                                                                                                                                                                                                                                                                                                                                                                                                                                  | 0.23           | 0.26          |
| <b>Nutrient specifications</b>                                                                                                                                                                                                                                                                                                                                                                                                                                                                                                                                                                                                           |                |               |
| <sup>2</sup> ME Kcal/kg diet                                                                                                                                                                                                                                                                                                                                                                                                                                                                                                                                                                                                             | 2975           | 3025          |
| Digestible Lysine (%)                                                                                                                                                                                                                                                                                                                                                                                                                                                                                                                                                                                                                    | 1.22           | 1.12          |
| Digestible Methionine + Cysteine (%)                                                                                                                                                                                                                                                                                                                                                                                                                                                                                                                                                                                                     | 0.91           | 0.85          |
| Digestible Methionine (%)                                                                                                                                                                                                                                                                                                                                                                                                                                                                                                                                                                                                                | 0.46           | 0.45          |
| Digestible Threonine (%)                                                                                                                                                                                                                                                                                                                                                                                                                                                                                                                                                                                                                 | 0.83           | 0.73          |
| Digestible Valine (%)                                                                                                                                                                                                                                                                                                                                                                                                                                                                                                                                                                                                                    | 0.89           | 0.85          |
| Digestible Isoleucine (%)                                                                                                                                                                                                                                                                                                                                                                                                                                                                                                                                                                                                                | 0.77           | 0.72          |
| Digestible Arginine (%)                                                                                                                                                                                                                                                                                                                                                                                                                                                                                                                                                                                                                  | 1.28           | 1.18          |
| Digestible Tryptophan (%)                                                                                                                                                                                                                                                                                                                                                                                                                                                                                                                                                                                                                | 0.20           | 0.18          |
| Crude protein (%)                                                                                                                                                                                                                                                                                                                                                                                                                                                                                                                                                                                                                        | 21.50          | 20.00         |
| Ca (%)                                                                                                                                                                                                                                                                                                                                                                                                                                                                                                                                                                                                                                   | 0.90           | 0.84          |
| Available P (%)                                                                                                                                                                                                                                                                                                                                                                                                                                                                                                                                                                                                                          | 0.45           | 0.42          |
| Na (%)                                                                                                                                                                                                                                                                                                                                                                                                                                                                                                                                                                                                                                   | 0.23           | 0.16          |
| Cl (%)                                                                                                                                                                                                                                                                                                                                                                                                                                                                                                                                                                                                                                   | 0.22           | 0.19          |
| K (%)                                                                                                                                                                                                                                                                                                                                                                                                                                                                                                                                                                                                                                    | 0.95           | 0.72          |
| Choline (mg/kg)                                                                                                                                                                                                                                                                                                                                                                                                                                                                                                                                                                                                                          | 500            | 400           |
| Linoleic acid (%)                                                                                                                                                                                                                                                                                                                                                                                                                                                                                                                                                                                                                        | 1.00           | 1.00          |
| <sup>1</sup> Vitamin premix incorporated in each kg of basal diets: Vitamin A 10,000 IU; vitamin D3 5000 IU; vitamin E 80 IU (starter), 50 IU (grower); vitamin K 3 mg; vitamin B1 3 mg (starter), 2 mg (grower); vitamin B2 9 mg (starter), 8 mg (grower); vitamin B6 4 mg (starter), 3 mg (grower); vitamin B12 0.02 mg (starter), 0.015 mg (grower); Biotin 0.15 mg (starter), 0.12 mg (grower); Pantothenic acid 15 mg (starter), 12 mg (grower); Folic acid 2 mg. Mineral premix incorporated in each kg of basal diets: Mn, 100 mg; Zn, 100 mg; Fe, 40 mg, Cu, 15 mg, I, 1 mg, Se, 0.35 mg. <sup>2</sup> ME, metabolizable energy. |                |               |
