# Supplementary material for: Effects of Lactobacillus fermentum Administration on Intestinal Morphometry and Antibody Serum Levels in Salmonella-Infantis-Challenged Chickens
Source: MDPI journal article supplement (doi:10.3390/microorganisms11020256), 2023-01-19
Supplement: s1 [file s1]

**Table S1.** Experimental design.

| Day                                   | Control,<br>orally | Lf<br><i>L. fermentum</i><br>treatment, orally | Si<br><i>S. Infantis</i><br>treatment, orally        | LfSi<br>Co-exposure<br>treatment, orally                                                                     |
|---------------------------------------|--------------------|------------------------------------------------|------------------------------------------------------|--------------------------------------------------------------------------------------------------------------|
| 1 – 3 d                               | Saline<br>solution | 10 <sup>9</sup> CFU/0.2 mL<br>(Probiotic)      | Saline solution                                      | 10 <sup>9</sup> CFU/0.2 mL<br>(Probiotic)                                                                    |
| 4 d                                   | Saline<br>solution | 10 <sup>9</sup> CFU/0.2 mL<br>(Probiotic)      | 10 <sup>7</sup> CFU/0.1 mL<br>( <i>S. Infantis</i> ) | 10 <sup>9</sup> CFU/0.2 mL<br>( <u>Probiotic</u> ) +<br>10 <sup>7</sup> CFU/0.1 mL<br>( <i>S. Infantis</i> ) |
| 5 – 7 d<br>(1 dpi – 3 dpi)            | Saline<br>solution | 10 <sup>9</sup> CFU/0.2 mL<br>(Probiotic)      | Saline solution                                      | 10 <sup>9</sup> CFU/0.2 mL<br>(Probiotic)                                                                    |
| 8 – 14 d<br>(4 dpi – 10 dpi)          | NT                 | NT                                             | NT                                                   | NT                                                                                                           |
| 15 d<br>(11 dpi) sample<br>collection | 10                 | 10                                             | 10                                                   | 10                                                                                                           |

NT, no treatment; dpi, days post-infection.
